# Supplementary material for: Determination of paraquat in drinking water by HPLC-UV using large-volume injection and a superficially porous particle HILIC column
Source: Royal Society of Chemistry journal article supplement (doi:10.1039/d5ay01675d), 2025-12-18
Supplement: d5ay01675d3.pdf [file d5ay01675d3.pdf]

## SUPPLEMENTARY INFORMATION

Figure S1. Chromatographic behavior of paraquat (1.0 mg L<sup>-1</sup>) as a function of acetonitrile content in the mobile phase (45-75%, v/v). Conditions: flow rate of 0.8 mL min<sup>-1</sup>, column temperature 30 °C, and UV detection at 257 nm.
